# Supplementary material
Source: PubMed Central journal article supplement (PMC3012545)
Supplement: blood-2010-05-285395_1.pdf [file blood-2010-05-285395_1.pdf]

|                                                                                                                                                                                                                             |                                                                                                                                                                                                                                                                                                                                                                                                                                                                                                      |
|-----------------------------------------------------------------------------------------------------------------------------------------------------------------------------------------------------------------------------|------------------------------------------------------------------------------------------------------------------------------------------------------------------------------------------------------------------------------------------------------------------------------------------------------------------------------------------------------------------------------------------------------------------------------------------------------------------------------------------------------|
| <p><b>n-cluster-111</b><br/>           Chromosome-1<br/>           Hairpin: 17604384-17604470<br/>           Mature: 17604443-17604464<br/>           Conservation score: 0<br/>           Presence of miR*:No</p>          | <pre> 10      20      30      40 -- CCATT  CT  -  TG--  GAATG GC   TGCCTGG  TGGGG  TGGCAG  TCC  TGG  A CG   ACGGGACC  GCCCC  ACCGTC  AGG  ACC  G TA  AC---  TT  G  C  TCAA  GTAGA       80      70      60      50           </pre> <p>GCCCATTTGCCCTTGGCTTGGGGTGGCAGTCTCTGTGGGAATGAGAGATGCCAAACTGGAC<b>CTGCCAGCCCCGTTCCAG</b><br/> <b>GGCACAGCAT</b></p>                                                                                                                                             |
| <p><b>n-cluster-778</b><br/>           Chromosome-11<br/>           Hairpin: 36031648-36031754<br/>           Mature: 36031731-36031753<br/>           Conservation score: 0.981<br/>           Presence of miR*:No</p>     | <pre> 10      20      30      40      50 CC  G  CTCT  GC  A-  AGGA  -  C  C GC  AGG  TAG  CTGTATT  TTGTT  CATTTT  TTGCTTGC  CC  TTG  \ CG  TCC  ATT  GACATGA  AACAA  GTAAAG  GACGGACG  GG  AAC  T AT  G  AC--  --  AC  AA--  T  T  C       100      90      80      70      60           </pre> <p>GCCCAGGGTAGCTCTGTATTGCTTGTACATTTTAGGATTGCTTCCCCTTGTCCAATGGTGCAGGCAGAAGAAAT<br/> <b>GCAAACAAGTACAGCATTAGCCTTAGC</b></p>                                                                            |
| <p><b>n-cluster-108</b><br/>           Chromosome-12<br/>           Hairpin: 5840694-5840832<br/>           Mature: 5840701-5840724<br/>           Conservation score: 0.012<br/>           Presence of miR*:No</p>         | <pre> 10      20      30      40      50      60      70 TGA  ATATA  GA  A-  AT  G  T-  AC  G-  TTC  C  A GGG  GAGAGCAG  AGATT  ATGTCAT  TG  AGT  GG  TGCA  GGC  CTTTA  ACAAT  A CTC  TTTTGTGC  TTTAG  TACAGTA  AC  TCA  TC  ATGT  TCG  GAAGT  TGTTA  A ----  GGTA-  130  GG  120  GS  110  CG  G  TT  CA  AG  T--  80  A  T           </pre> <p>TGAGGGATATAGAGAGCAGGAAGATTAATGTCATATTGGAGTTGGACTGCAGGGCTTCTTTACACAATAAATATTG<br/> TATGAAGTGCTGATGTAACCTTTACTGCAGCATGACATGGGATTGGCTGTTTTTATGGCTC</p> |
| <p><b>s-cluster-100</b><br/>           Chromosome-12<br/>           Hairpin: 17826233-17826328<br/>           Mature: 17826242-17826264<br/>           Conservation score: 0.773<br/>           Presence of miR*:No</p>     | <pre> 10      20      30      40 GTT-----  A-----  CAT  AA  TGCACC  40  AA CAGGG  A---  A---  TGT  GGTAA  CATA  TTT  T GTCC  TTTCCG  ACA  TCACTT  GTAT  AAA  A CAAAACC  CATGCC  ---  TAAACA  C  CT       90      80      70      60      50           </pre> <p>GTTCAGGGA<b>AAAGGTCATTGTAAGGTTAATGC</b>ACCATATTTAATATCAAACATGACAAATTTGACTACAGCCTTT<br/> CCGTACCCTGCCAAAC</p>                                                                                                                         |
| <p><b>s-cluster-200</b><br/>           Chromosome 18<br/>           Hairpin: 33171701-33171770<br/>           Mature: 33171746-33171767<br/>           Conservation score: 0.006<br/>           Presence of miR*:Yes</p>    | <pre> 10      20      30      TA CATGT  AGGT  AGTG  ATT  GCT  ATTTC  AC  \ GTACA  TTCA  TCAC  TAA  CCG  TAAAG  TG  G       C  G  T  AG  GA---  GA       60      50      40           </pre> <p>CATGTAGGTGAGTGATTGCTATTTCAAAGACTAGAGGTAGGAAAT<b>GAGGCTAATGCACTACTTCACATG</b></p>                                                                                                                                                                                                                      |
| <p><b>s-cluster-373</b><br/>           Chromosome-5<br/>           Hairpin: 82135974-82136043<br/>           Mature: 82135976-82135998<br/>           Conservation score: 0.315<br/>           Presence of miR*:No</p>      | <pre> 10      20      30      CG -  G  T-  T  TAACTT  T  G TT  TGCT  CA  CGTAAT  AAGTGGTT  G AA  ACGG  GT  GTATTG  TTCACTAA  G T  G  TT  -  TTTAAT-  AT       60      50      40           </pre> <p>TT<b>GTGCTTCATCGTAATTAACCTTA</b>AGTGGTTCCGGGTAATCACTTTAATTTGTTATGTGTTGGCAGAAT</p>                                                                                                                                                                                                               |
| <p><b>t-cluster-427</b><br/>           Chromosome-9<br/>           Hairpin: 33952750-33952871<br/>           Mature: 33952814-33952836<br/>           Conservation score: 0.913<br/>           Presence of miR*:Yes</p>     | <pre> 10      20      30      40      50 AAAAAATTTT  T-----  T  TCA-----  AAATTC  GAATC  \ TTTTTTAAGA  ATCTT  GTCCAGGAAAC  GGTAGTT  CACATG  CACATG  \ TTTTCATC  TAGAA  CAGGCTTTTTG  CCAATAA  GTGTAT  GTGTAT  A 120  110  100  90  80  70  60           </pre> <p>AAAAAATTTTATCTTTGTCCAGGAAACTCAGGTAGTTAAATCCACATGGAATCATCAGATAT<b>GTGCTTGGAAATTAC</b><br/> <b>CACATCAT</b>TGTTTTCTGGACTAAGACTACTACTGTAGAATTTTT</p>                                                                                   |
| <p><b>t-cluster-510</b><br/>           Chromosome-X<br/>           Hairpin: 109325346-109325446<br/>           Mature: 109325349-109325372<br/>           Conservation score: 0.003<br/>           Presence of miR*:Yes</p> | <pre> 10      20      30      40      50 TG  -  AT  ----  AGCCAAAAT  AA  AAAT TCAG  GAAAAGC  ATGC  CCAAGGCT  GTGG  TAG  GGGCCA  T AGTT  CTTTTG  TACG  GGTTCGA  CACC  ATC  CCGGGT  C       TT  C  --  80  ACGA  70  A-  60  CCAAT           </pre> <p>TCAG<b>GTGGAAAGCATGCATCCAGGGTGT</b>GGAGCCAAAATTAGAAGGGCCAAAATTTACTGCCCCACTACCACAGCA<br/> ACCTTGGGCATCGTTTTCTTTTGA</p>                                                                                                                           |
| <p><b>t-cluster-916</b><br/>           Chromosome-16<br/>           Hairpin: 33964216-33964307<br/>           Mature: 33964279-33964302<br/>           Conservation score: Yes<br/>           Presence of miR*:1</p>        | <pre> 10      20      30      40 A  TT  GA  CC  GA  C---  T  C GGATGST  AGT  GGC  TCT  TCAGC  CCGCCGGG  CAG  C TCTATCA  TCA  CTG  AGA  AGTCG  GGTGGTCC  GTC  C A  GT  AG  AC  AG  CAA  C  A       90      80      70      60      50           </pre> <p>AGGATGGTTTGTAGTGGCCCTCTGATCAGCCCCCGGGTTCAGCCCACTGCCCTGGTGAAC<b>CTGAGAAGACAGTC</b><br/> <b>GAACCTGACTATCTA</b></p>                                                                                                                           |

The novel miRNAs identified in AML1 and normal CD34 are shown here with their hairpin and mature miRNA genomic location (NCBI37). Conservation of the miRNAs is denoted by their conservation score with a score more than 0.7 representing high conservation among species. The hairpin structure is shown with the mature miRNAs marked with a red line. The mature miRNA sequence is colored red within the hairpin structure of the miRNA.
